# Supplementary material for: Multiple Components of the VHL Tumor Suppressor Complex Are Frequently Affected by DNA Copy Number Loss in Pheochromocytoma
Source: Int J Endocrinol. 2014 Sep 14;2014:546347. doi: 10.1155/2014/546347 (PMC4178909; doi:10.1155/2014/546347)
Supplement: Supplementary file 1 — Supplementary material provides a sample correlation plot for methylation, copy number and expression data in PCC tumors; the incidence of VHL elongin BC protein complex component gene disruption in the context of other mutations common in PCC; the gene enrichment score for the cohort of PCC tumors and a list of HIF1α gene targets. Supplementary figure 1 shows that RBX1, a VHL elongin BC complex component, is hypomethylated and that aberrant DNA methylation does not appear to be a major mechanism of deregulation. Supplementary figure 2 highlights that mutations in NF1, HRAS and RET (other genes commonly mutated in PCC) occur independent of VHL elongin BC protein complex status. Supplementary tables detail the level of HIF1 enrichment in each PCC sample and the genes that are transcritionally regulated by HIF1. [file 546347.f1.zip]

Archive with 4 entries (4 files):
- 546347.f1/Supplementary figure 2.xlsx
- 546347.f1/Supplementary figure1 cg07288693_RBX1.pdf
- 546347.f1/Supplementary Table 1.xlsx
- 546347.f1/Supplementary Table 2.xlsx
