# Supplementary figures and images for: Multiple Components of the VHL Tumor Suppressor Complex Are Frequently Affected by DNA Copy Number Loss in Pheochromocytoma
Source: Hindawi journal article supplement (doi:10.1155/2014/546347), 2014-01-01

# *RBX1* promoter probe

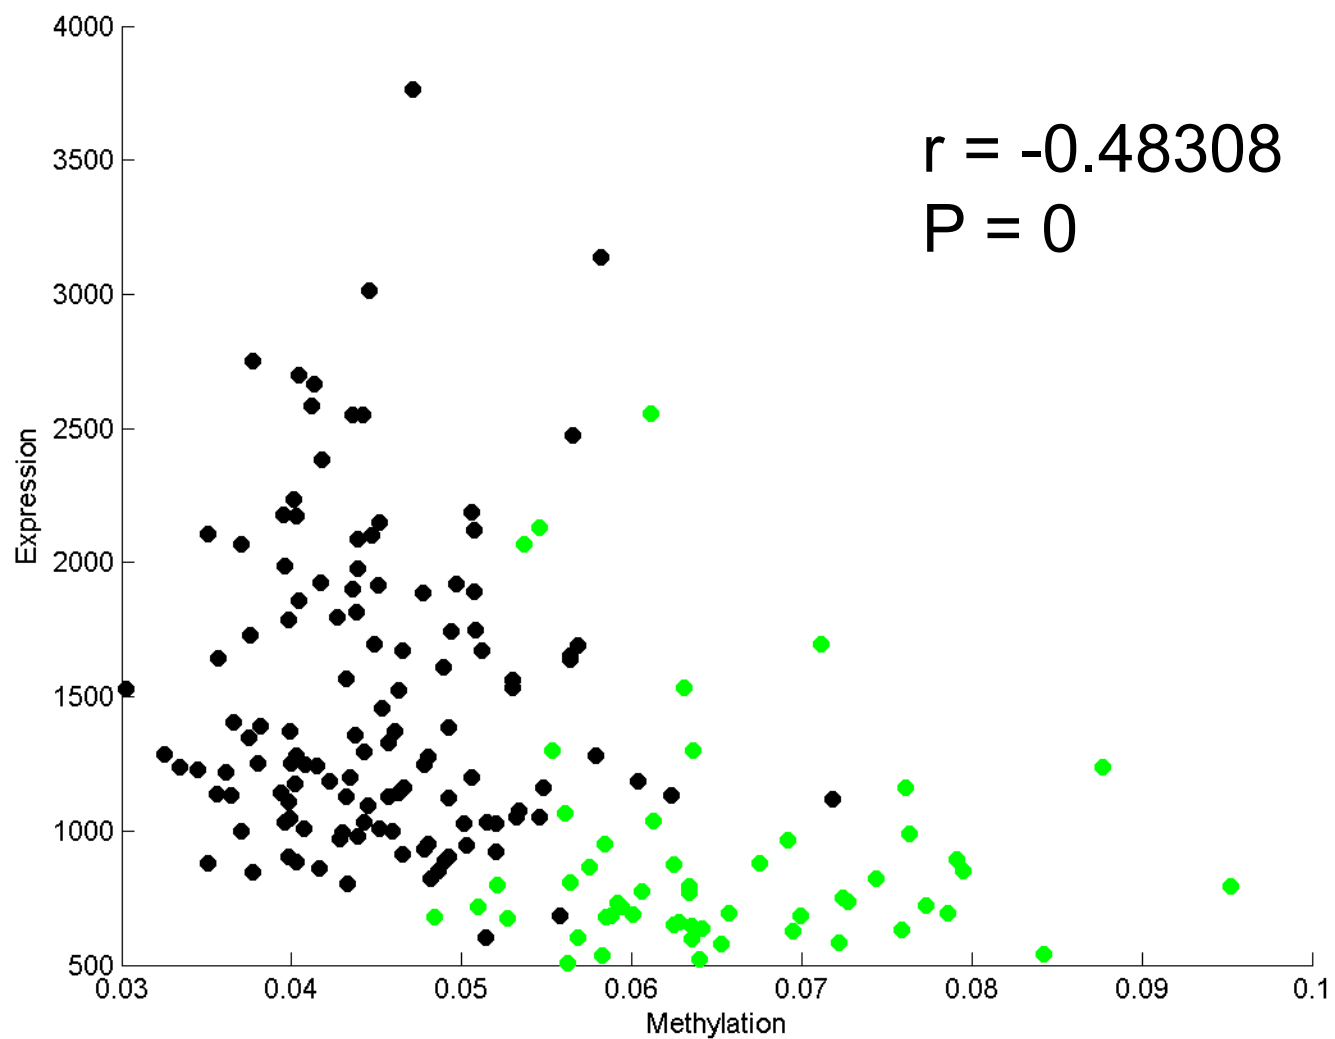

Supplement: f1 [file 546347.f1.zip]
